# Supplementary material for: Cannabidiol Induces Apoptosis and Perturbs Mitochondrial Function in Human and Canine Glioma Cells
Source: PubMed Central journal article supplement (PMC8385407; doi:10.3389/fphar.2021.725136), 2021-08-11
Supplement: Image1.pdf [file Image1.pdf]

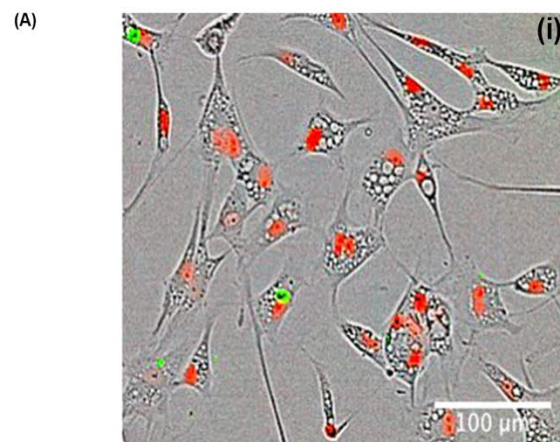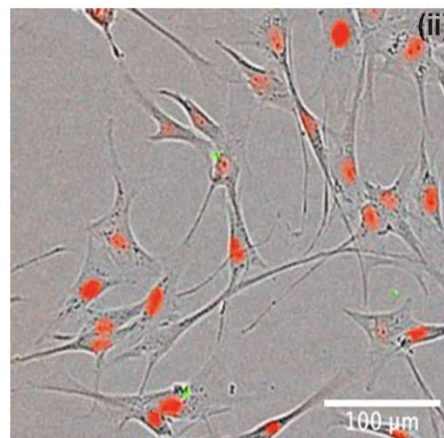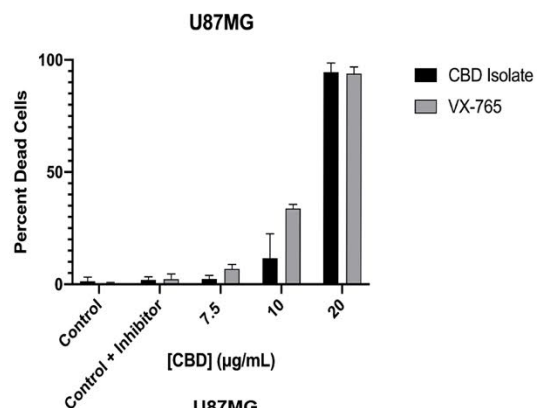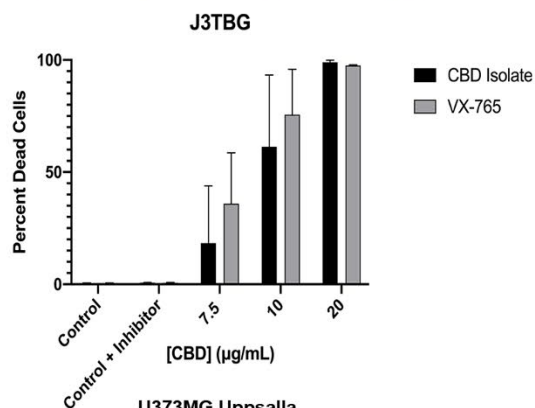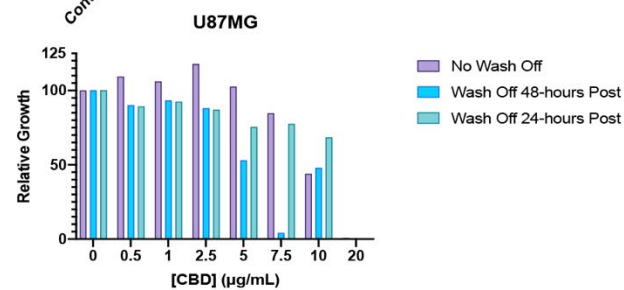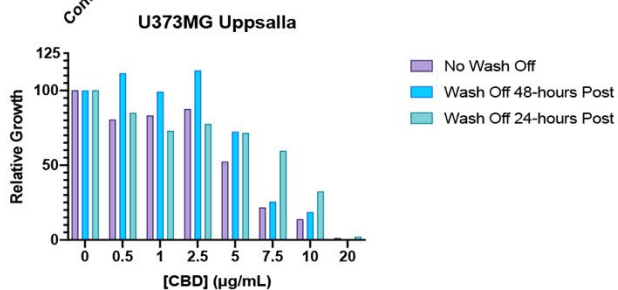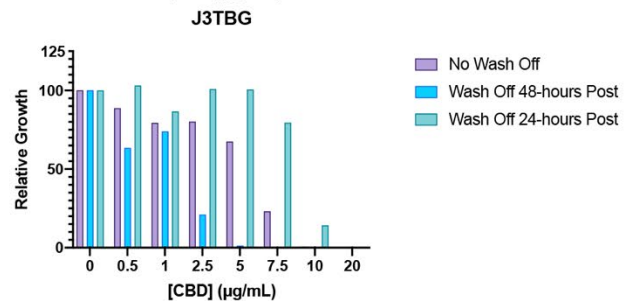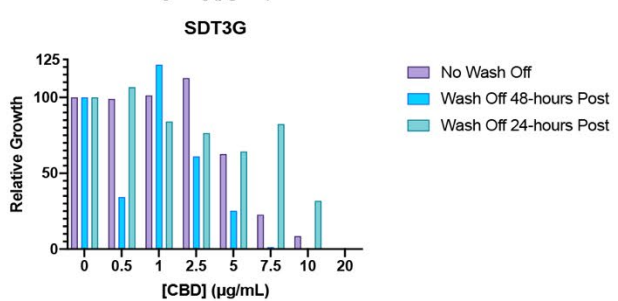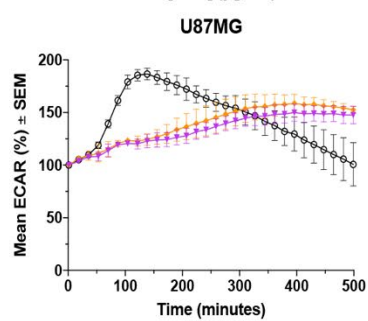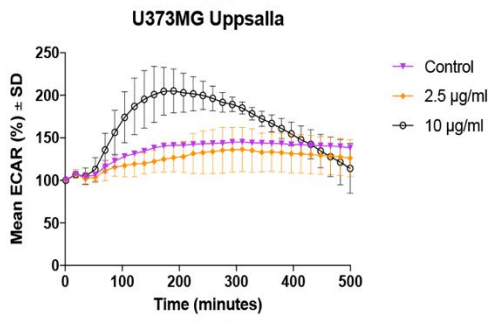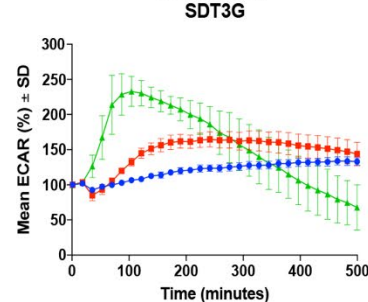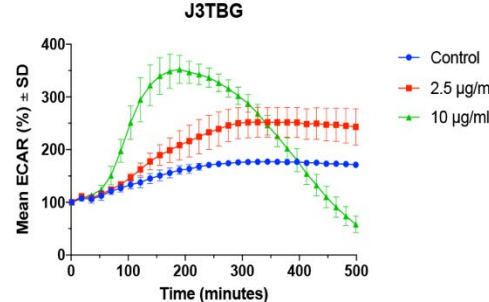

**Supplementary Figure:** (A) SDT3G Glioma cells featuring formation of intracellular vesicles after 48 hours of treatment with 7.5 µg/ml CBD isolate (i), SDT3G Glioma cells featuring absence of intracellular vesicles after 48 hours of concurrent treatment with 7.5 µg/ml CBD isolate and GSK '872 (1 µM) (ii). (B) Cytotoxicity of U87MG and J3TBG glioma cells treated with CBD isolate (0 - 20 µg/mL) and VX-765 (50 µM) concurrently for 96 hours. Representative of n = 2 independent experiments expressed as mean ± SD (C) Relative growth of glioma cells (Control = 100%) treated with CBD isolate (0 - 20 µg/mL) for 96 hours, sub-groups had the CBD-supplemented media replaced with fresh CBD-free media at 24 and 48 hours. Representative of n = 1 independent experiments (D) Glioma cells were measured for baseline extracellular acidification rate for 30 minutes, then treated with CBD at lethal (10 µg/mL) and non-lethal (2.5 µg/mL) concentrations. ECAR was monitored for 500 minutes using the SeaHorse XF24. Representative of n = 2 independent experiments expressed as mean ± SD
